# Supplementary material for: Seasonal variability of intermediate water masses in the Gulf of Cádiz: implications of the Antarctic and subarctic seesaw
Source: Copernicus journal article supplement (doi:10.5194/os-15-1381-2019), 2019-10-22
Supplement: Supplementary file 1 [file os-15-1381-2019-supplement.pdf]

Supplement of Ocean Sci., 15, 1381–1397, 2019  
<https://doi.org/10.5194/os-15-1381-2019-supplement>  
© Author(s) 2019. This work is distributed under  
the Creative Commons Attribution 4.0 License.

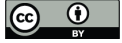

*Supplement of*

## **Seasonal variability of intermediate water masses in the Gulf of Cádiz: implications of the Antarctic and subarctic seesaw**

**David Roque et al.**

*Correspondence to:* David Roque ([david.roque@icman.csic.es](mailto:david.roque@icman.csic.es))

The copyright of individual parts of the supplement might differ from the CC BY 4.0 License.

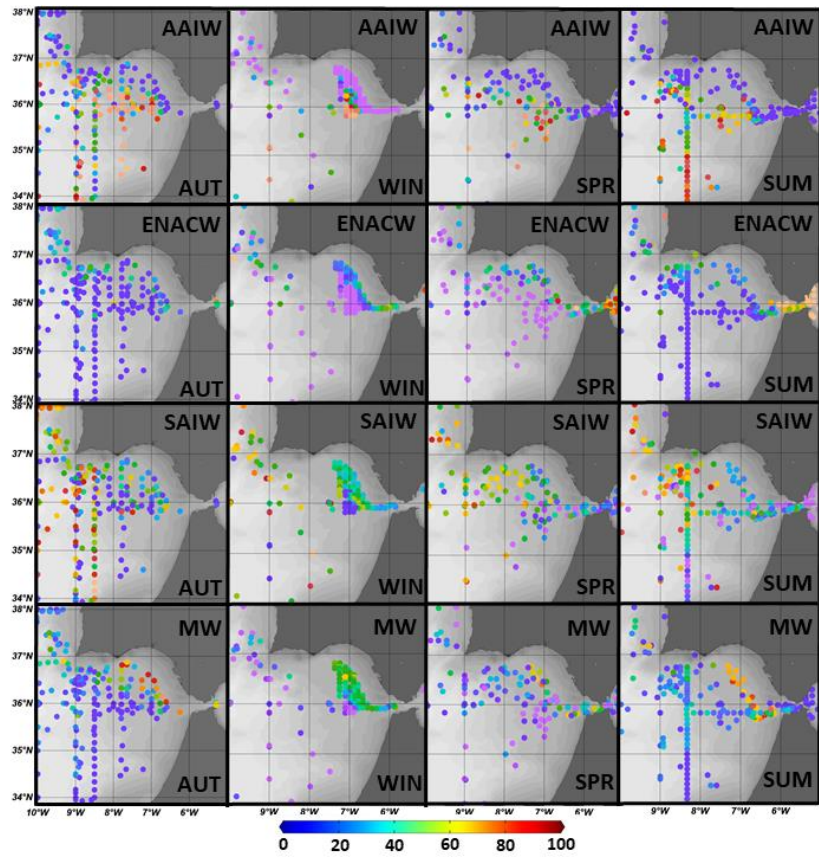

Sup\_1. Predominant intermediate water mass between 400-1000 m in every profile. From left to right: autumn, winter, spring and summer. From top to bottom: every water mass; AAIW, ENACW, SAIW, MW

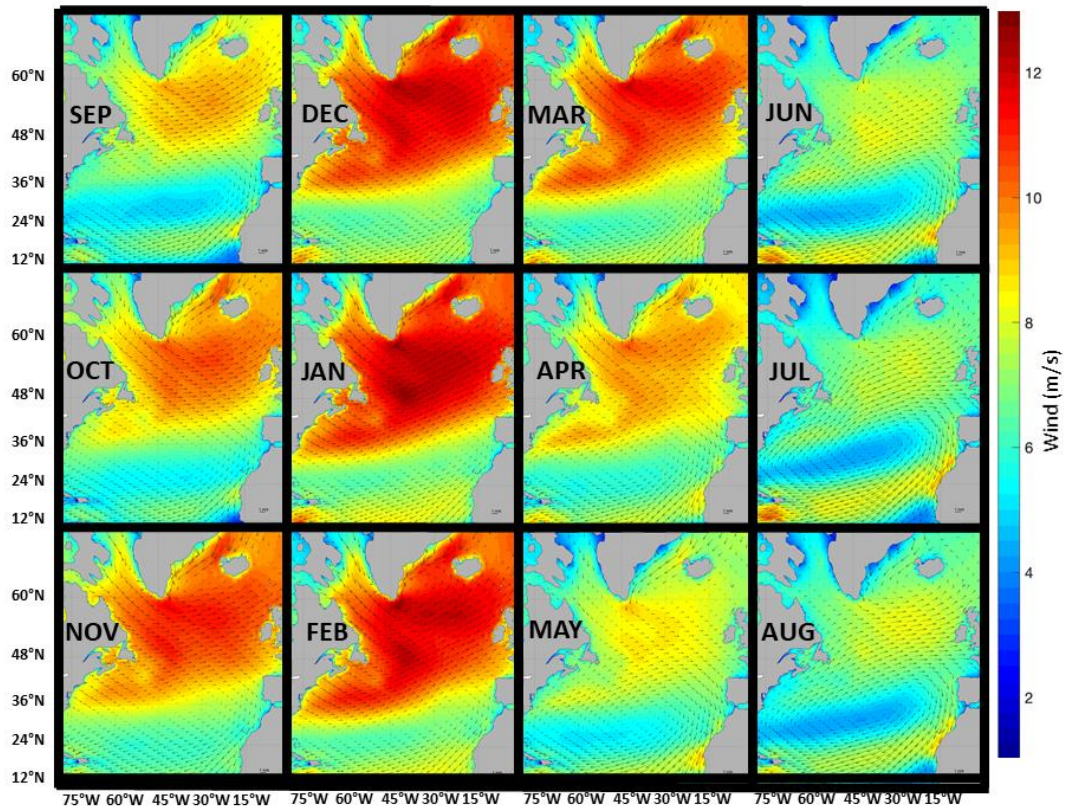

Sup\_2. Monthly Maps of surface winds in the North Atlantic Ocean.

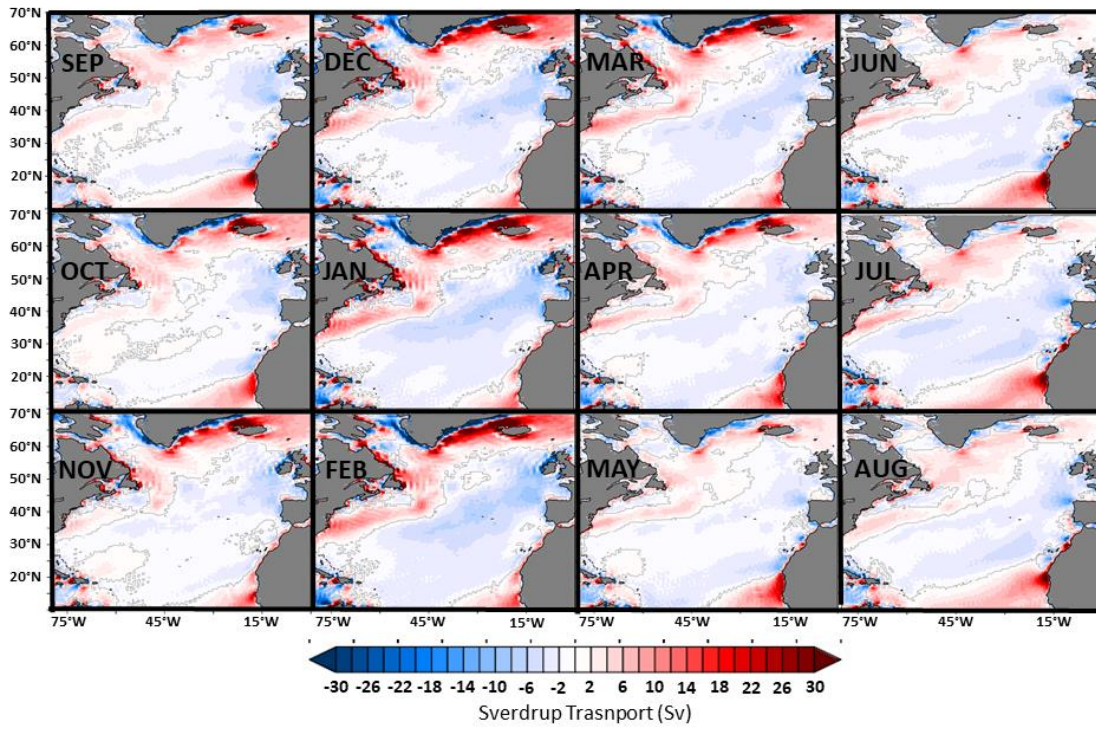

Sup\_3. Monthly Maps of Sverdrup transport in the North Atlantic Ocean.

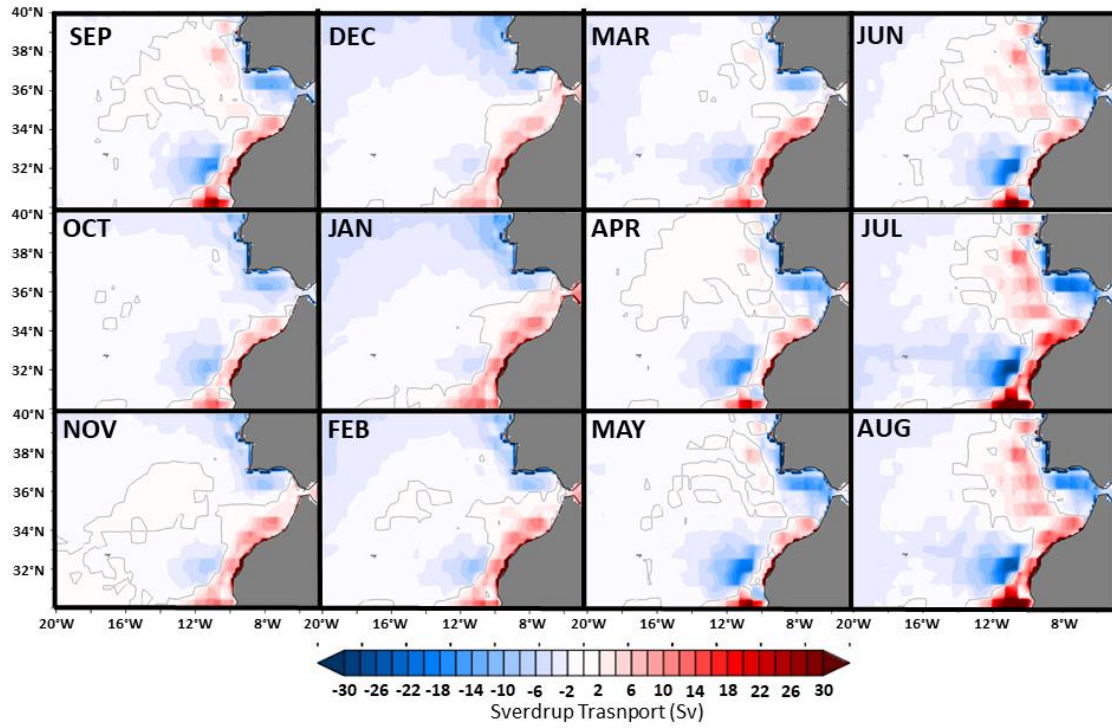

Sup\_4. Monthly Maps of Sverdrup transport in the Gulf of Cádiz.

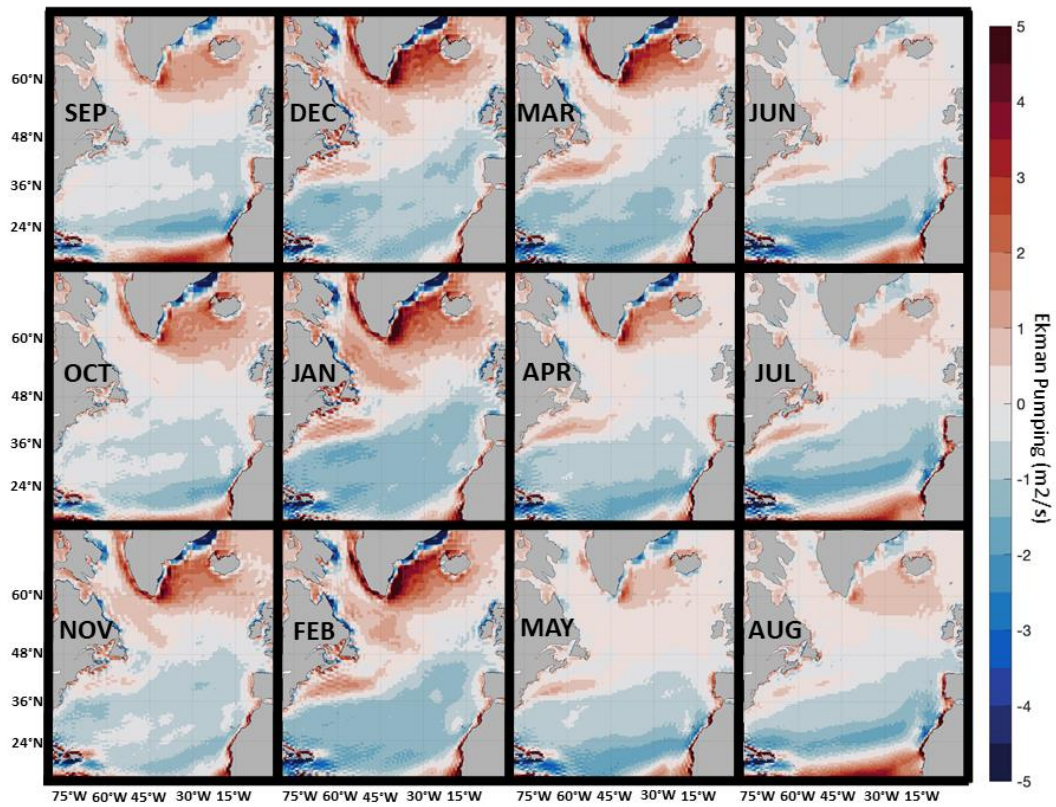

Sup\_5. Monthly Maps of Ekman Pumping in the North Atlantic Ocean.

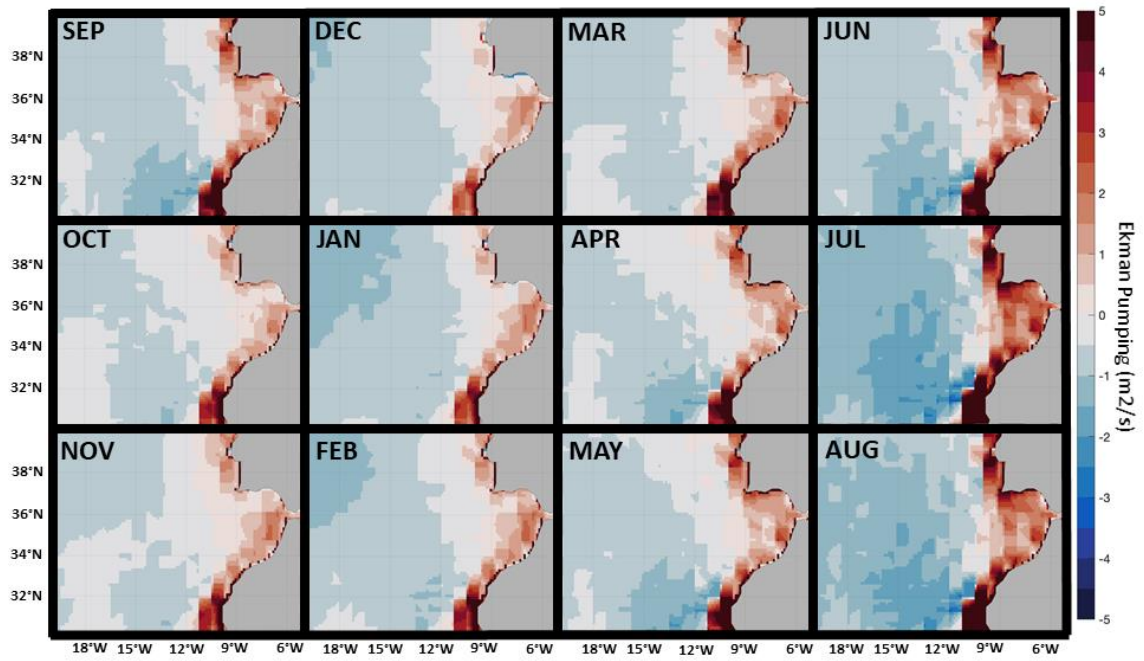

Sup\_6. Monthly Maps of Ekman Pumping in the Gulf of Cádiz.
